# A structural approach to disentangle the visualization of bipartite biological networks

J. Garcia-Algarra<sup>a,b,\*</sup>, J. M. Pastor<sup>b,c</sup>, M. L. Mouronte<sup>d</sup>, J. Galeano<sup>b,c,\*</sup>

<sup>a</sup>*Centro Universitario U-TAD, Las Rozas, Spain*

<sup>b</sup>*Complex Systems Group, Universidad Politecnica de Madrid, Spain*

<sup>c</sup>*ETSIAAB, Dept. Ingenieria Agroforestal, Universidad Politecnica de Madrid, Spain*

<sup>d</sup>*Computer Science Department, Universidad Francisco de Vitoria, Madrid, Spain*

---

## Abstract

Interactions between two different guilds of entities are pervasive in biology. They may happen at molecular level, like in a disease, or amongst individuals linked by biotic relationships, such as mutualism or parasitism. These sets of interactions are complex bipartite networks. Visualization is a powerful tool to explore and analyse them but the most common plots, the bipartite graph and the interaction matrix, become rather confusing when working with real biological networks. We have developed two new types of visualization that exploit the structural properties of these networks to improve readability. A technique called *k-core decomposition* identifies groups of nodes that share connectivity properties. With the results of this analysis it is possible to build a plot based on information reduction (Polar Plot) and another which takes the groups as elementary blocks for spatial distribution (Ziggurat plot). We describe the applications of both plots and the software to create them.

*Key words:* Biological bipartite networks, visualization, *k-core* decomposition

---

## 1. Introduction

1 Network Science is a powerful tool for biological research across all scales:  
2 molecular [1, 2, 3], genetic [4, 5, 6], individual [7, 8] and communitary [9, 10].

---

\*Corresponding author

Email addresses: [javier.galeano@upm.es](mailto:javier.galeano@upm.es) (J. Galeano)

3 The conceptual framework is valid for them all, and this fact has fostered both  
4 theoretical and applied developments. An important subset of biological net-  
5 works are bipartite. They have two different classes of nodes. Each one that  
6 may be tied to nodes of the opposite guild but never to its peers.

7 Gene-protein, host-pathogen and predator-prey interactions are the basis of  
8 bipartite biological networks. A common structural property of them is the  
9 core-periphery organisation [11, 12, 13]. This fact is well-known in ecology.  
10 In mutualistic communities there is one group of very interconnected nodes,  
11 the **generalists**, that provide stability and resilience [14]. Species with a low  
12 number of links (**degree**) are tied to those specialists. This property is called  
13 nestedness and there are different indexes to measure its strength [15]. Another  
14 important structural feature is modularity, that accounts for the existence of  
15 small groups of nodes of high degree inside a network sparsely connected [16].

16 In many cases the issue of interest is not the generalization of the network  
17 properties but the study of a particular system itself. In these fields dealing with  
18 complex systems scientists are more interested in finding special relationships  
19 or understanding the role of a specific node than their statistical properties. A  
20 more detailed, qualitative rather than quantitative analysis about relationships  
21 in a complex network may be more useful for some researchers in Medicine,  
22 Biology, Sociology or even Economy. Visualization may play an important role  
23 in network analysis as it between data and people [17, 18, 19].

24 The range of possible applications is wide [20]. For instance, a field ecologist  
25 could identify central species and those most endangered within a community  
26 with a good network plot. A clinical researcher may detect anomalies in com-  
27 plex gene-protein associations. Visualization is an essential procedure in the  
28 exploratory stage [21], but it requires fast and interactive applications able to  
29 disentangle structure. Although a lot of effort has been put in analytic tools  
30 development, those designed for bipartite biological visualization are still scarce  
31 [22, 23, 24, 25, 26, 27].

32 The most common plots in literature are the bipartite graph and the in-  
33 teraction matrix, two ways to visualize a bipartite network of any kind. In

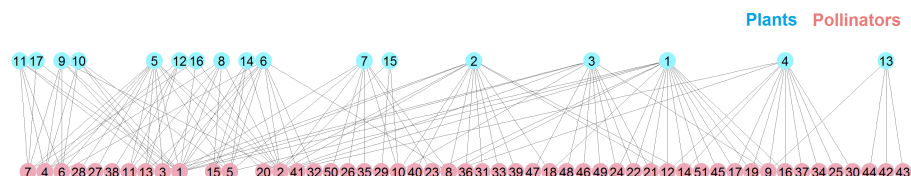

Figure 1: Mutualistic community in Tenerife, Canary Islands (Spain), with 68 species and 129 links [28]. In mutualism, species fall into two disjoint guilds, such as plants and pollinators or plants and seed dispersers. Ties amongst species of the same guild are forbidden.

the *bipartite graph*, nodes of both classes are plotted along parallel lines. Interactions appear as links amongst them (fig. 1). On one hand, it is quite simple, as it makes clear the separation of guilds. On the other, it is not easy to follow indirect interactions, those between two nodes of the same class linked by a common node of the opposite. They are not much relevant in affiliation networks (journals-authors, movies-actors) [29], but are extremely important in many biological networks. They create feedback loops that increase complexity and eventually emerging properties that arise from it [30, 31].

When the number of nodes of a bipartite plot is in the range of a few tens it becomes extremely confusing. It is hard to distinguish individual links and impossible to follow indirect interactions. Accumulation of links in the space between guilds creates what is known as the *hairball effect* [32], but the main shortcoming of the bipartite plot is that it does not show the network hierarchical organisation.

In the *interaction matrix*, nodes of one guild are arranged along rows and species of the opposite guild along columns. A filled cell marks the interaction between two species. With the interaction matrix it is possible to visually discover patterns of nestedness and modularity, so it is more expressive in the representation of structure. On the other hand, indirect interactions are even less apparent than in the bipartite plot. The matrix also becomes difficult to interpret when the number of nodes and links raise.

To overcome the drawbacks of the bipartite graph and the interaction matrix there are two possible attack strategies: information reduction or taking

57 advantage of known network traits to order nodes and links in space. In this  
58 paper, we explain how structural properties of bipartite biological networks are  
59 the basis of two new types of visualization. Both rely on a classical technique  
60 called *k-core decomposition*. We also describe an interactive application to plot  
61 them.

## 62 2. Plots

63 The rationale behind this research is that, as biological networks are not  
64 random, this fact should provide a natural way to group nodes using their  
65 topological properties. These groups must be the basis for a spatial distribution  
66 that minimizes the hairball effect and, in addition, makes structural sense.

67 The *k-core decomposition* is a fast and efficient technique to cluster nodes  
68 by their connectivity properties [33, 34]. The *k-core* of a graph  $G$  is a maximal  
69 connected subgraph of degree  $k$ . Each node of the core of order  $m$  (called *m-shell*)  
70 has links with at least  $m$  other nodes that belong to that same core.  
71 The practical implication of this definition is that nodes are classified according  
72 to their connectivity. The innermost shell is the set of highest  $k$  index nodes.  
73 Nodes with higher degrees are the *generalists*. As  $k$  index decreases, nodes  
74 become more specialist. The usual way to identify the *m-shell* subsets is the  
75 *pruning* algorithm: one starts pruning the nodes with just one link, recursively.  
76 This subset of nodes constitutes the *1-shell*. The remaining nodes are tied by  
77 at least two links. In the next step one extracts nodes with only two links,  
78 also recursively; this subset is the *2-shell*. And so on. This procedure helps to  
79 recognize how the nodes of the *m-shell* are tied to the network. We refer to [35]  
80 for further details on the **k-core** analysis of bipartite networks.

81 As a result of the analysis we define two magnitudes. The first one is  $k_{radius}$ .  
82 The  $k_{radius}^A(m)$  of node  $m$  of guild  $A$  is the average distance to all nodes of the  
83 innermost shell of guild  $B$  (set  $C^B$ ).

$$k_{radius}^A(m) = \frac{1}{|C^B|} \sum_{j \in C^B} dist_{mj} \quad m \in A \quad (1)$$

84 where  $dist_{mj}$  is the shortest path from node  $m$  of guild  $A$  to node  $j$  of guild  
85  $B$ . In an intuitive way,  $k_{radius}$  measures how far the node is from the most  
86 connected shell, the group that is the corner stone of the network; *the closest*  
87 *to one the strongest the tie to the core*

88 The second magnitude is  $k_{degree}$ . It is defined as the sum of the inverses of  
89  $k_{radius}$  of neighbour nodes:

$$k_{degree}^A(m) = \sum_j \frac{a_{mj}}{k_{radius}^B(j)} \quad m \in A, \forall j \in B \quad (2)$$

90 where  $a_{mj}$  is the element of the interaction matrix that represents the link,  
91 considered as binary (1 if  $a_{mj} > 0$ , 0 if  $a_{mj} = 0$ ). Note that this magnitude  
92 is a weighted degree where the weight is the inverse of the  $k_{radius}$ , in such a  
93 way that links to the periphery are underestimated, so  $k_{degree}$  is a measure of  
94 centrality.

## 95 2.1. The Polar plot

96 The  $k$ -core decomposition helps to visualize very large systems and networks  
97 and to understand their structure [36, 37]. In particular, the *fingerprint plot*,  
98 uses a polar coordinate system [38]. Nodes are depicted at a distance pro-  
99 portional to the shell they belong to and their areas are proportional to their  
100 **degree**.

101 Taking this idea as the starting point, we build the *polar plot*. Differences  
102 are noteworthy. The first one is the bipartite nature of the networks, so space is  
103 divided in two half planes, one for each guild. Node shapes are also different for  
104 each guild. This plot provides an overview of how far from the core the nodes  
105 are and, at the same time, their connectivity (by the size of the marker) and to  
106 which  $m$ -shell they belong (by the color of the marker). This visualization is  
107 interesting to detect some special features of the network; for instance, a well  
108 bonded core will present the innermost shell at distance  $k_{radius}$  equals to one,  
109 and a nested network will show a periphery close to the core. This plot shows  
110 the periphery nodes less relevant for the network connectivity as markers far

away from the core and it allows to detect highly connected nodes that do not belong to the core. Angle does not convey information, the algorithm computes it to reduce node overlapping. Links are not displayed.

Optionally, the user may choose to display the histograms of  $k_{degree}$ ,  $k_{radius}$  and  $k_{shell}$ . The  $k_{radius}$  histogram shows the distribution of node distances to network core. The  $k_{degree}$  histogram is very similar to the degree distribution but with non-integer bins, due to the weights in its definition. The most interesting histogram is that of the  $k_{shell}$ ; a typical nested network exhibits a U-shaped  $k_{shell}$  histogram. This shape of distribution is related to a big core and numerous peripheral nodes; a L-shaped histogram is related to a network with too many peripheral nodes and a small core.

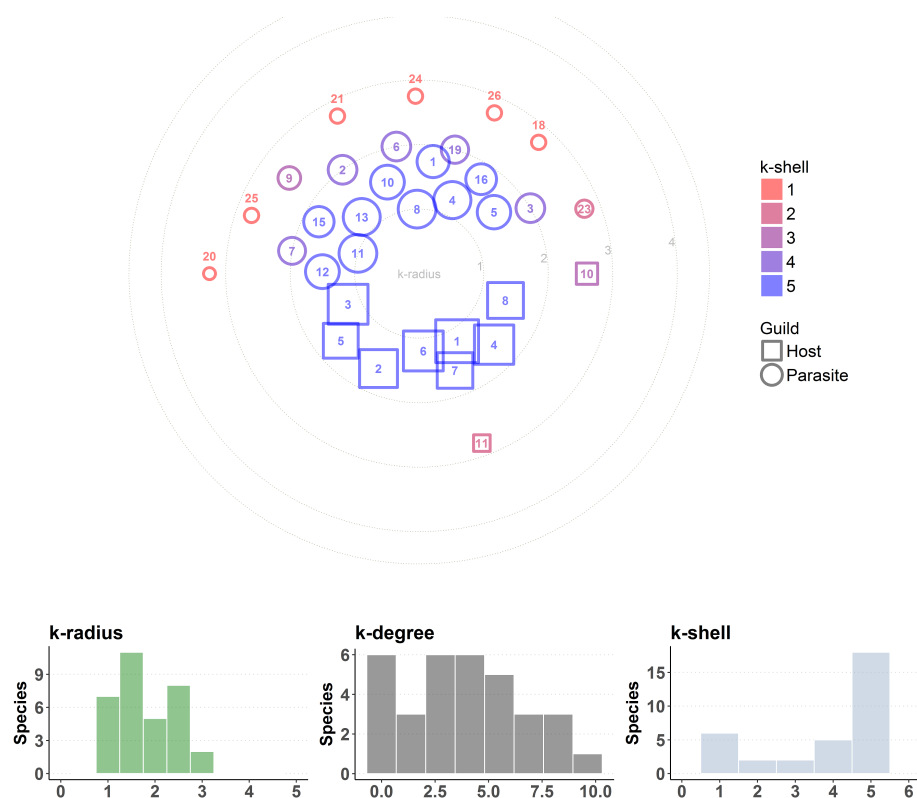

Figure 2: Host-parasite assembly in Tyva (Russian Federation) [39].

Figure 2 is the polar plot of a host-parasite assembly with a characteristic

high concentration of nodes in the innermost shell. Most nodes lay inside the  $k_{radius}$  1 circle but there is a sensible number of outlying species. This network is moderately nested ( $NODF = 29$ ).

## 2.2. The Ziggurat plot

The polar plot does not show network links, as it works on the information reduction strategy. The ultimate goal of this research is the creation of a new kind of diagram with as many details as possible. The basic idea is grouping nodes by their  $k$ -shell. If we stick nodes with the same  $k$ -index in a reduced area, links amongst the same shell nodes will not spread across the whole space. Only ties with their edges in different shells would have long paths. This simple principle is not so easy to implement. The bipartite nature of networks means that links have to go from one guild to the opposite.

The core-periphery organization implies that there are many ties from 1-shell nodes towards upper  $k$ -index groups. Nodes with high degree are prone to be visually suffocated by surrounding links in the bipartite graph. See plant species numbers 1, 2, 3, 4 in figure 1. This danger is a formidable obstacle.

Figure 3 shows a ziggurat plot under construction. It is the same network of fig. 1. The  $k$ -core decomposition puts each species inside one shell, we do not show nodes of 1-shell at this moment. The maximum  $k$ -index is 4 for this community.

The innermost shell is found on the center of the plot, slightly leftwards. Nodes are rectangular-shaped, and are ordered by  $k_{degree}$ . Heights decrease just for plotting convenience. The specular position of both guilds leaves space to draw the links amongst them. In fig. 3 we have plotted just three connections from *pollinator1* towards plants of 4-shell.

Lower  $k$ -shells have ziggurat shape, with nodes ordered by ascending  $k_{radius}$ , so *pollinator7* is the closest to the innermost shell in 3-shell. Links inside the shell (gray color) connect the left sides of rectangles (*plant4-pollinator9*). Links between two different shells (green) connect the right side of the highest  $k$ -index node to the left side of the lowest one (*plant17-pollinator7*).

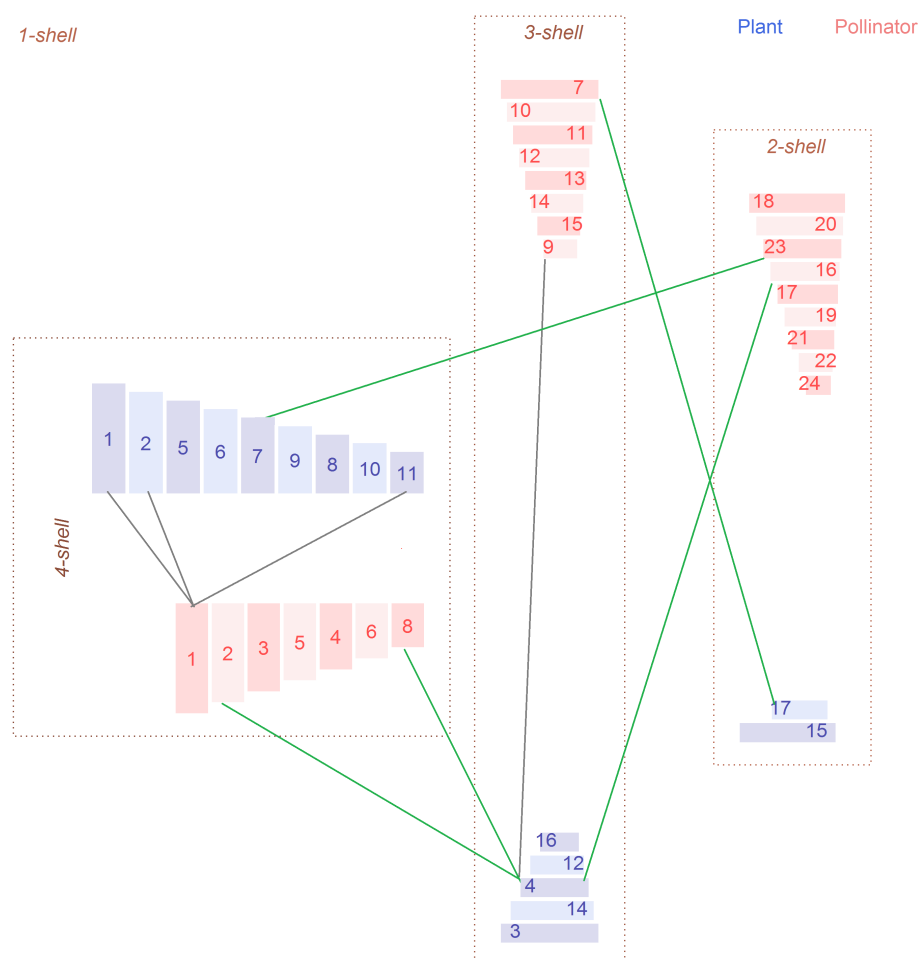

Figure 3: Building blocks of the ziggurat plot.

153 *3-shell* ziggurats are more distant from the horizontal axis than *2-shell* zig-  
 154 gurats. Moving them up or down, it is possible to change the area of the internal  
 155 almond-shaped space defined by the ziggurats and the innermost shell triangles.  
 156 This area is key because links from *4-shell* lay here, and do not cross the inner  
 157 ziggurats.

158 The outer space is the *1-shell* nodes home. We divide them into three groups:  
 159 outsiders, tails and chains of specialists. Outsiders are nodes disconnected from  
 160 the giant component. They are unusual in recorded ecological networks because



by definition they do not interact with the community. This network lacks outsiders. Tails are nodes directly connected to higher  $k$ -index nodes. They are very common, and to reduce the number of lines we apply a simple grouping rule. If  $n$  tails are tied to the same species of a ziggurat, we plot them in a unique box with just one link. Chains of specialists are less frequent. They are built with nodes of 1-shell linked amongst them, the edge that has a link with a higher  $k$ -index shell is the root node (*plant13*).

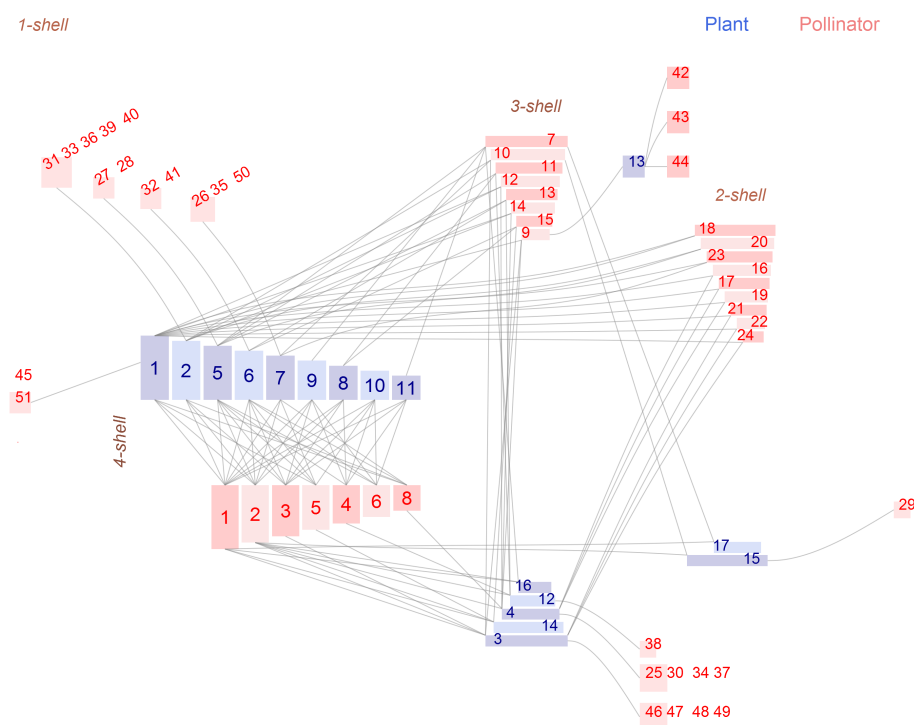

Figure 4: Ziggurat plot of the same plant-pollinator community in Tenerife, Canary Islands (Spain), that appears in fig. 1

Putting everything together, we obtain the ziggurat plot of fig. 4. This may be compared with the bipartite graph of the same network (fig. 1).

Links are drawn as straight lines or splines, that make the diagram more appealing to the eye. If links are weighted, setting the width of each link to be proportional to a function of the interaction strength is optional.

173       Note that, for a given node, the main links are those towards higher  $k$ -shells.  
 174       With this plot is very easy to observe how many links depart from a node to  
 175       higher and to lower  $k$ -shells. One can also compare if a node is connected to  
 176       higher  $k$ -shell than another one, and then if its contribution to the network is  
 177       more important.

### 178   3. Exploratory analysis using $k$ -core plots

179       - The ziggurat plot unveils structural details that are hard to visualize in the  
 180       bipartite graph. Figure 5 is a network of associations amongst human diseases  
 181       and non-coding RNA (lncRNA), we refer to the original paper to compare  
 182       with the bipartite visualization [40]. It is a small network with 39 nodes and  
 183       low connectivity, just 44 links. The highest degree lncRNA node is number 8  
 184       (XIST), that in the bipartite plot looks as the most central one. The ziggurat  
 185       shows at a glance that despite its high connectivity, it appears in association with  
 186       diseases that belong to its chain of specialists. On the other hand, diseases like  
 187       breast cancer and acute myeloid leukemia are associated with multiple *lncRNAs*.

188       The network of figure 6 is slightly bigger, with 29 gene signatures used for  
 189       predicting the reoperative treatment response of breast cancer and 19 pathways  
 190       to different types of cancer [41]. The bipartite plot is hard to understand in  
 191       the original paper, because of the number of ties. With 149 links, it becomes a  
 192       *hairball* and the problem is just its own nature.

193       Figure 6 shows a network with a stronger hierarchy than figure 5. The  
 194       identification of genes most frequently associated with pathways to cancer is  
 195       straightforward.

196       The main application of the polar plot is the visual comparison of networks  
 197       even if their sizes are very different. Figure 7 is a subset of a disease-cofactor  
 198       network. Authors selected diseases tied to at least 5 cofactor-interacting proteins  
 199       (39 nodes) and plotted the bipartite graph 7. The ziggurat plot (fig. 7A) of the  
 200       subset shows an extremely nested structure, an effect of the selection rule. The  
 201       polar plot of this network fragment (fig. 7B) has an uncommon organization of

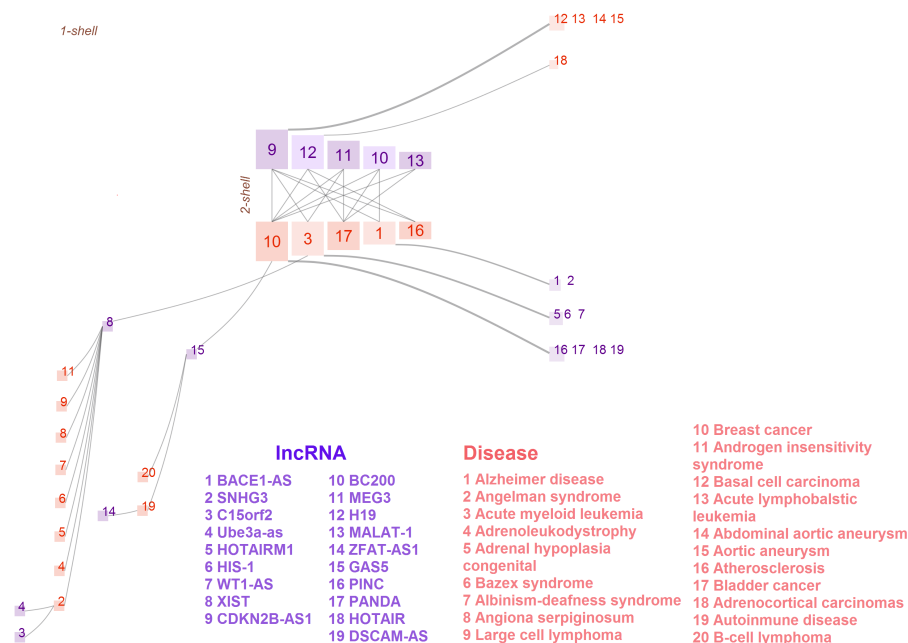

Figure 5: IncRNA-disease association network [40].

202 disease nodes, at almost the same  $k_{radius}$  distance of the center. The polar plot  
 203 of the full network (fig. 7B), with 414 nodes, displays a much richer structure.  
 204 Diseases are distributed across a wider range of  $k_{radius}$ . Most cofactors have  
 205 high degree and were not filtered. As a result, the structure of this guild is very  
 206 similar in both polar plots.

207 These figures are a small sample of the importance of choosing a good visu-  
 208 alization tool with a correct analysis of decomposition of a network.

#### 209 4. Software

210 The  $k$ -core analysis and plotting of ziggurat and polar graphs is provided as  
 211 an open source application.

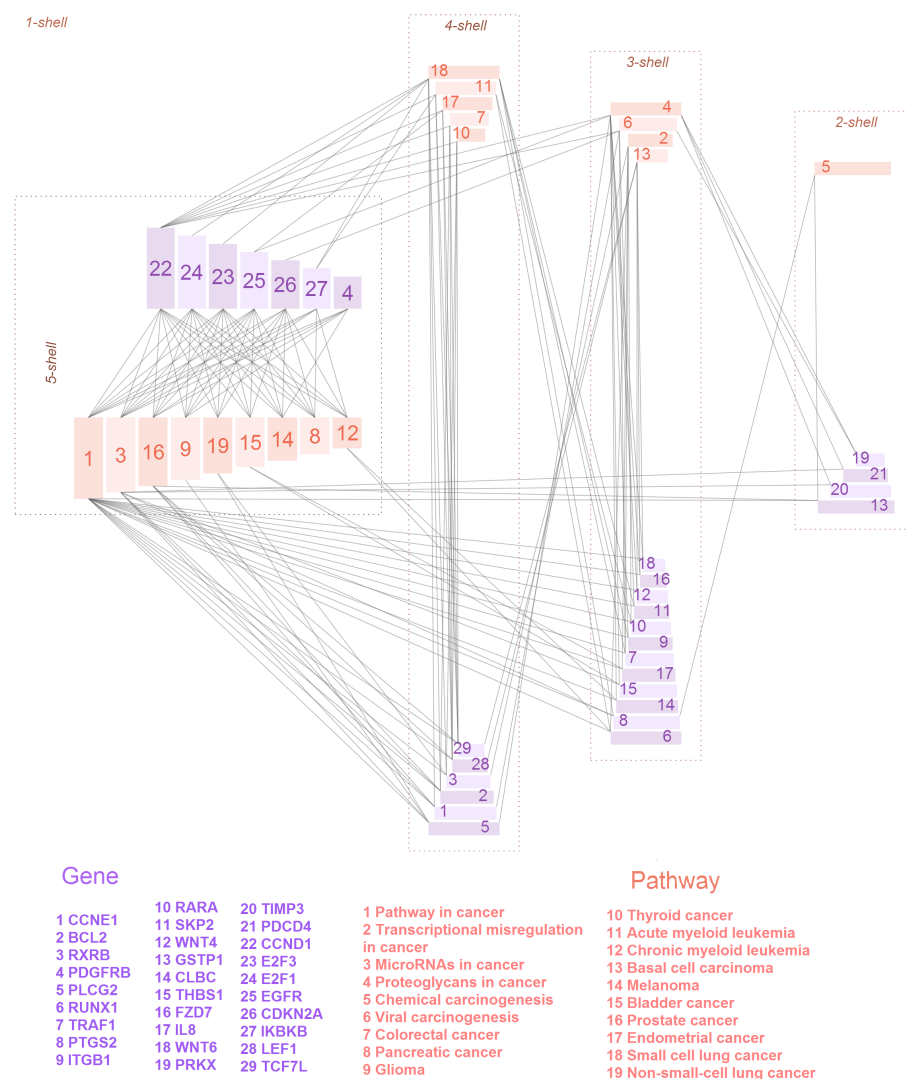

Figure 6: Gene-pathway association network [41].

#### 4.1. The kcorebip package

The R package `kcorebip` contains the functions to perform the analysis and to plot static graphs of a network. It comes with a set of networks for testing purposes. Ecological data were downloaded from the *web of life* database [43]. As the format of the *web of life* files has become a standard *de facto* by its

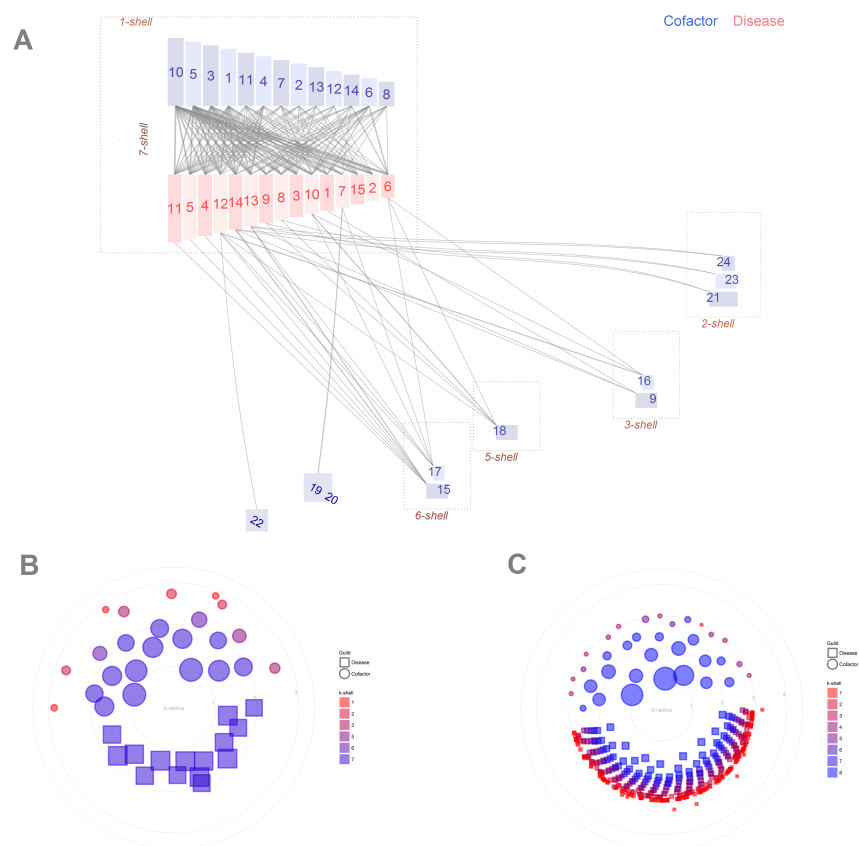

Figure 7: Disease-cofactor network [42]. A: ziggurat plot of the subset. B: polar plot of the subset. C: polar plot of the full network

simplicity, `kcorebip` follows the same convention for input files.

The function `network_k_analysis` computes the *k-magnitudes* and other useful indexes, using the functions that provide packages as `bipartite` and `igraph` [44, 45]. We refer to the user manual for details.

Ziggurat and polar graphs use basic calls to the `ggplot2` graphics package [46]. We compute from scratch coordinates and sizes, not relying on other network plotting libraries.

## 224 4.2. Interactive application

225 The **kcorebip** package is a powerful solution for researchers with program-  
226 ming skills that need high quality plots for scientific publications, but ex-  
227 ploratory analysis requires a more interactive approach. **Bipartgraph** has de-  
228 signed with this need in mind.

229 The technological choice is **Shiny**, the R reactive programming environment.  
230 It has the advantage of a native backend and a **Javascript**-based user interface  
231 that may be easily extended. This combination of technologies ensures a wide  
232 compatibility with most common operating systems.

233 The **Interactive Ziggurat** is the main feature of **Bipartgraph**. The orig-  
234 inal implementation of the **kcorebip** package only provided the **ggplot2** object  
235 to display or save. To create an interactive version we faced two main choices,  
236 replicating the code with a dynamic technology or extending **kcorebip**. We  
237 found a fast and almost non intrusive solution creating an **SVG** object. The zig-  
238 gurat is a set of rectangles, lines and texts. The most time consuming tasks are  
239 network analysis and spatial distribution. These computations are performed  
240 just once, and besides each **ggplot2** element the function plots, it creates the  
241 **SVG** equivalent.

242 The browser displays the **SVG** ziggurat with multiple options for the user:  
243 tooltips, select a node or a link, highlight connections, zoom in and zoom out.  
244 In addition, a second panel shows information of highlighted nodes and the  
245 available information on Wikipedia (fig. 8).

246 The configuration panels make plot properties easy to modify. Visual and  
247 intuitive Shiny controls, as sliders or checkboxes, hide the complexity of the  
248 input parameters of the **ziggurat\_graph** function.

249 At any moment, the user may download the high quality, high resolution  
250 static plot with the **Printable Ziggurat** option. In order to reproduce the  
251 results or to include the graph in other environments, such as **R Markdown** or  
252 **Jupyter** notebooks, we added the **Download generating code** button. When  
253 clicked upon, **Bipartgraph** writes a file with the last **ziggurat\_graph** call, ready  
254 to use in any R script.

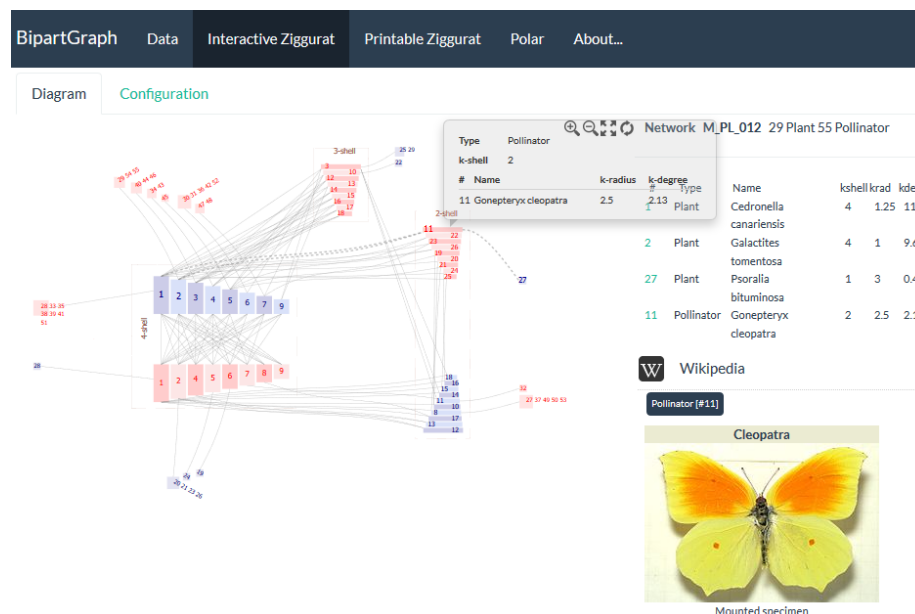

Figure 8: Interactive ziggurat user interface. Plant-pollinator assembly in Garajonay, Canary Islands (Spain), recorded by Olesen. Highlighted the pollinator species number 11, *Gonepteryx cleopatra*

There is not interactive version of the Polar plot, as we think that network exploration is much easier with the ziggurat. The user may produce the static polar plot, the high quality downloadable PNG file and the generating code, in the same way that we have explained with the ziggurat.

## 5. Conclusions

Visualization of bipartite biological networks is very useful for researchers when they are interested in following the paths from a node or scanning the structure of the network. Using the *k-core* decomposition we have designed and developed two new graphs that work by information reduction (Polar plot) and spatial grouping by connectivity (Ziggurat plot). They provide two complementary views of internal network structure.

We would like to emphasize the importance of choosing a correct visualiza-

tion of complex networks, and in particular of bipartite networks, that helps a correct understanding of networks of a large number of nodes and high density.

Software is provided as Open Source, under a very loose MIT license, and comes in two versions. The package `kcorebip` provides the full functionality for researchers with a minimum of R programming skills. The application `Bipartgraph` is the fully fledged interactive environment to build both kind of graphs for this public. Its user centric design makes it very easy to master, provides some additional features and is open to new fields of application such as education.

## Software Availability

Name of software: BipartGraph

Programming language: R

Operating system: Windows, Linux and MacOS

Availability: SW at <https://github.com/jgalgarra/bipartgraph>

User interface: Web browser

License: Free, under MIT License

## Acknowledgements

This work was supported by Ministry of Economy and Competitiveness of Spain (MTM2015-63914-9).

## Data availability

Interaction matrixes were downloaded from the web of life database <http://www.web-of-life.es/>. A subset of these matrixes is installed by default with *BipartGraph*, including all networks used in this paper.



## References

- [1] H. Jeong, B. Tombor, R. Albert, Z. N. Oltvai, A.-L. Barabási, The large-scale organization of metabolic networks, *Nature* 407 (6804) (2000) 651–654.
- [2] J. J. Hamilton, J. L. Reed, Software platforms to facilitate reconstructing genome-scale metabolic networks, *Environmental microbiology* 16 (1) (2014) 49–59.
- [3] L. M. Dersch, V. Beckers, C. Wittmann, Green pathways: Metabolic network analysis of plant systems, *Metabolic engineering* 34 (2016) 1–24.
- [4] K.-I. Goh, M. E. Cusick, D. Valle, B. Childs, M. Vidal, A.-L. Barabási, The human disease network, *Proceedings of the National Academy of Sciences* 104 (21) (2007) 8685–8690.
- [5] D. Diez, A. Agustí, C. E. Wheelock, Network analysis in the investigation of chronic respiratory diseases. from basics to application, *American journal of respiratory and critical care medicine* 190 (9) (2014) 981–988.
- [6] B. Wang, A. M. Mezlini, F. Demir, M. Fiume, Z. Tu, M. Brudno, B. Haibe-Kains, A. Goldenberg, Similarity network fusion for aggregating data types on a genomic scale, *Nature methods* 11 (3) (2014) 333–337.
- [7] J. Krause, D. Lusseau, R. James, Animal social networks: an introduction, *Behavioral Ecology and Sociobiology* 63 (7) (2009) 967–973.
- [8] C. Pasquaretta, M. Levé, N. Claidiere, E. Van De Waal, A. Whiten, A. J. MacIntosh, M. Pelé, M. L. Bergstrom, C. Borgeaud, S. F. Brosnan, et al., Social networks in primates: smart and tolerant species have more efficient networks, *Scientific reports* 4 (2014) 7600.
- [9] K. McCann, Protecting biostructure, *Nature* 446 (7131) (2007) 29.

- 315 [10] P. Jordano, Patterns of mutualistic interactions in pollination and seed dis-  
316 persal: connectance, dependence asymmetries, and coevolution, *The Amer-*  
317 *ican Naturalist* 129 (5) (1987) 657–677.
- 318 [11] M. R. Da Silva, H. Ma, A.-P. Zeng, Centrality, network capacity, and mod-  
319 ularity as parameters to analyze the core-periphery structure in metabolic  
320 networks, *Proceedings of the IEEE* 96 (8) (2008) 1411–1420.
- 321 [12] F. Luo, B. Li, X.-F. Wan, R. H. Scheuermann, Core and periphery struc-  
322 tures in protein interaction networks, *Bmc Bioinformatics* 10 (4) (2009)  
323 S8.
- 324 [13] S. Bruckner, F. Hüffner, C. Komusiewicz, A graph modification approach  
325 for finding core–periphery structures in protein interaction networks, *Algo-*  
326 *rithms for Molecular Biology* 10 (1) (2015) 16.
- 327 [14] J. Bascompte, P. Jordano, C. J. Melián, J. M. Olesen, The nested as-  
328 sembly of plant–animal mutualistic networks, *Proceedings of the National*  
329 *Academy of Sciences* 100 (16) (2003) 9383–9387.
- 330 [15] W. Ulrich, M. Almeida-Neto, N. J. Gotelli, A consumer’s guide to nested-  
331 ness analysis, *Oikos* 118 (1) (2009) 3–17.
- 332 [16] M. E. Newman, Modularity and community structure in networks, *Pro-*  
333 *ceedings of the National Academy of Sciences* 103 (23) (2006) 8577–8582.
- 334 [17] N. P. Rougier, M. Droettboom, P. E. Bourne, Ten simple rules for better  
335 figures, *PLoS computational biology* 10 (9) (2014) e1003833.
- 336 [18] E. J. Mulrow, *The visual display of quantitative information* (2002).
- 337 [19] A. Cairo, *The Functional Art: An introduction to information graphics*  
338 *and visualization*, New Riders, 2012.
- 339 [20] M. J. Pocock, D. M. Evans, C. Fontaine, M. Harvey, R. Julliard,  
340 Ó. McLaughlin, J. Silvertown, A. Tamaddoni-Nezhad, P. C. White, D. A.

- 341 Bohan, Chapter two-the visualisation of ecological networks, and their use  
342 as a tool for engagement, advocacy and management, *Advances in Ecolog-*  
343 *ical Research* 54 (2016) 41–85.
- 344 [21] J. W. Tukey, *Exploratory data analysis*.
- 345 [22] S. Yoon, I. Yoon, R. Williams, N. Martinez, J. Dunne, 3d visualization and  
346 analysis of ecological networks on www, in: *International Conference on*  
347 *Computer Graphics and Imaging*, MH Hamza, ISBN 0-88986-001-7, 2004,  
348 pp. 224–229.
- 349 [23] C. Kazancı, Econet: A new software for ecological modeling, simulation  
350 and network analysis, *Ecological Modelling* 208 (1) (2007) 3–8.
- 351 [24] H.-J. Schulz, M. John, A. Unger, H. Schumann, Visual analysis of bipartite  
352 biological networks, in: *Eurographics Workshop on Visual Computing for*  
353 *Biomedicine*, 2008.
- 354 [25] P. W. Lane, D. B. Lindenmayer, P. S. Barton, W. Blanchard, M. J. West-  
355 gate, Visualization of species pairwise associations: a case study of surro-  
356 gacy in bird assemblages, *Ecology and evolution* 4 (16) (2014) 3279–3289.
- 357 [26] C. O. Flores, T. Poisot, S. Valverde, J. S. Weitz, Bimat: a matlab package  
358 to facilitate the analysis of bipartite networks, *Methods in Ecology and*  
359 *Evolution* 7 (1) (2016) 127–132.
- 360 [27] D. Sint, M. Traugott, Food web designer: a flexible tool to visualize inter-  
361 action networks, *Journal of pest science* 89 (1) (2016) 1–5.
- 362 [28] L. Stald, A. Valido, J. Olesen, Struktur og dynamik i rum og tid at et  
363 bestøvningsnetværk på tenerife, de kanariske øer, Master’s thesis, Univer-  
364 sity of Aarhus, Denmark (2003).
- 365 [29] K. Faust, Centrality in affiliation networks, *Social networks* 19 (2) (1997)  
366 157–191.

- 367 [30] R. J. Prill, P. A. Iglesias, A. Levchenko, Dynamic properties of network  
368 motifs contribute to biological network organization, PLoS biology 3 (11)  
369 (2005) e343.
- 370 [31] S.-A. Marashi, M. Tefagh, A mathematical approach to emergent properties  
371 of metabolic networks: partial coupling relations, hyperarcs and flux ratios,  
372 Journal of theoretical biology 355 (2014) 185–193.
- 373 [32] A. Komarek, J. Pavlik, V. Sobeslav, Network visualization survey, in: Com-  
374 putational Collective Intelligence, Springer, 2015, pp. 275–284.
- 375 [33] S. B. Seidman, Network structure and minimum degree, Social Networks  
376 5 (3) (1983) 269–287.
- 377 [34] V. Batagelj, M. Zaversnik, An  $O(m)$  algorithm for cores decomposition of  
378 networks, arXiv preprint cs/0310049.
- 379 [35] J. García-Algarra, J. M. Pastor, J. M. Iriando, J. Galeano, Ranking of  
380 critical species to preserve the functionality of mutualistic networks using  
381 the k-core decomposition, PeerJ 5 (2017) e3321.
- 382 [36] M. Kitsak, L. K. Gallos, S. Havlin, F. Liljeros, L. Muchnik, H. E. Stanley,  
383 H. A. Makse, Identification of influential spreaders in complex networks,  
384 Nature Physics 6 (11) (2010) 888–893.
- 385 [37] H. Zhang, H. Zhao, W. Cai, J. Liu, W. Zhou, Using the k-core decompo-  
386 sition to analyze the static structure of large-scale software systems, The  
387 Journal of Supercomputing 53 (2) (2010) 352–369.
- 388 [38] J. I. Alvarez-Hamelin, L. Dall’Asta, A. Barrat, A. Vespignani, k-core de-  
389 composition: A tool for the visualization of large scale networks, arXiv  
390 preprint cs/0504107.
- 391 [39] J. D. Hadfield, B. R. Krasnov, R. Poulin, S. Nakagawa, A tale of two  
392 phylogenies: comparative analyses of ecological interactions, The American  
393 Naturalist 183 (2) (2013) 174–187.

- 394 [40] X. Yang, L. Gao, X. Guo, X. Shi, H. Wu, F. Song, B. Wang, A network  
395 based method for analysis of lncrna-disease associations and prediction of  
396 lncrnas implicated in diseases, PloS one 9 (1) (2014) e87797.
- 397 [41] L. He, Y. Wang, Y. Yang, L. Huang, Z. Wen, Identifying the gene signatures  
398 from gene-pathway bipartite network guarantees the robust model perfor-  
399 mance on predicting the cancer prognosis, BioMed research international  
400 2014.
- 401 [42] M. P. Scott-Boyer, S. Lacroix, M. Scotti, M. J. Morine, J. Kaput, C. Pri-  
402 ami, A network analysis of cofactor-protein interactions for analyzing asso-  
403 ciations between human nutrition and diseases, Scientific reports 6 (2016)  
404 19633.
- 405 [43] M. A. Fortuna, R. Ortega, J. Bascompte, The web of life, arXiv preprint  
406 abs/1403.2575.
- 407 [44] C. F. Dormann, B. Gruber, J. Fründ, Introducing the bipartite package:  
408 analysing ecological networks, interaction 1 (2008) 0–2413793.
- 409 [45] G. Csardi, T. Nepusz, The igraph software package for complex network  
410 research, InterJournal, Complex Systems 1695 (5) (2006) 1–9.
- 411 [46] H. Wickham, ggplot2: elegant graphics for data analysis, Springer, 2016.
